# Supplementary material for: Monoamidinate titanium complexes: highly active catalysts for the polymerization and copolymerization of l-lactide and ε-caprolactone
Source: Royal Society of Chemistry journal article supplement (doi:10.1039/c5ra15599a), 2015-01-01
Supplement: c5ra15599a1.pdf [file c5ra15599a1.pdf]

## Supplementary Information

### **Monoamidinate Titanium complexes: Highly Active Catalysts for the Polymerization and Copolymerization of L-Lactide and $\epsilon$ -Caprolactone.**

Rosita Lapenta, Mina Mazzeo, Fabia Grisi\*

*Department of Chemistry and Biology, University of Salerno. I-84084, Giovanni Paolo II 132 Fisciano, Salerno, Italy.*

#### **Table of contents**

|                                                                                                                                       |    |
|---------------------------------------------------------------------------------------------------------------------------------------|----|
| <b>Figure S1.</b> $^1\text{H}$ and homodecoupled NMR spectra (600 MHz, $\text{CDCl}_3$ , RT) of PLA.....                              | S2 |
| <b>Figure S2.</b> $^{13}\text{C}$ NMR spectra ( $\text{CDCl}_3$ , 25°C) of PCL-co-PLLA copolymers by <b>3</b> .....                   | S3 |
| <b>Figure S3.</b> $^{13}\text{C}$ NMR spectra ( $\text{CDCl}_3$ , 25°C) of PCL-co-PLLA copolymers by <b>1</b> .....                   | S4 |
| <b>Figure S4.</b> $^1\text{H}$ NMR spectrum (600 MHz, $\text{CDCl}_3$ , 298 K) of PCL-block-PLLA copolymer by <b>3</b> .....          | S5 |
| <b>Figure S5.</b> $^{13}\text{C}$ NMR spectrum (125 MHz, $\text{CDCl}_3$ , 298 K) of PCL-block-PLLA copolymer by <b>3</b> .....       | S5 |
| <b>Figure S6.</b> DSC thermogram of PCL-block-PLLA copolymers by <b>3</b> . .....                                                     | S6 |
| <b>Figure S7.</b> DSC thermogram of PCL-block-PLLA copolymers by <b>1</b> .....                                                       | S6 |
| <b>Figure S8.</b> DSC thermogram of PLLA-block- PCL copolymers by <b>3</b> .....                                                      | S7 |
| <b>Figure S9.</b> DSC thermogram of PLLA -block- PCL copolymers by <b>1</b> .....                                                     | S7 |
| <b>Figure S10.</b> $^1\text{H}$ NMR spectrum (300 MHz, $\text{CDCl}_3$ , 298 K) of CL/LA copolymer reaction mixture by <b>3</b> ..... | S8 |

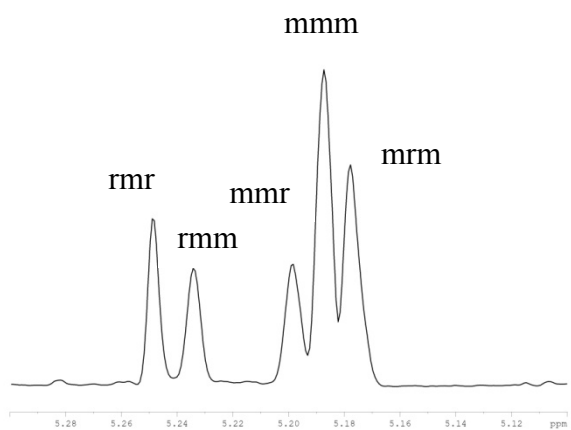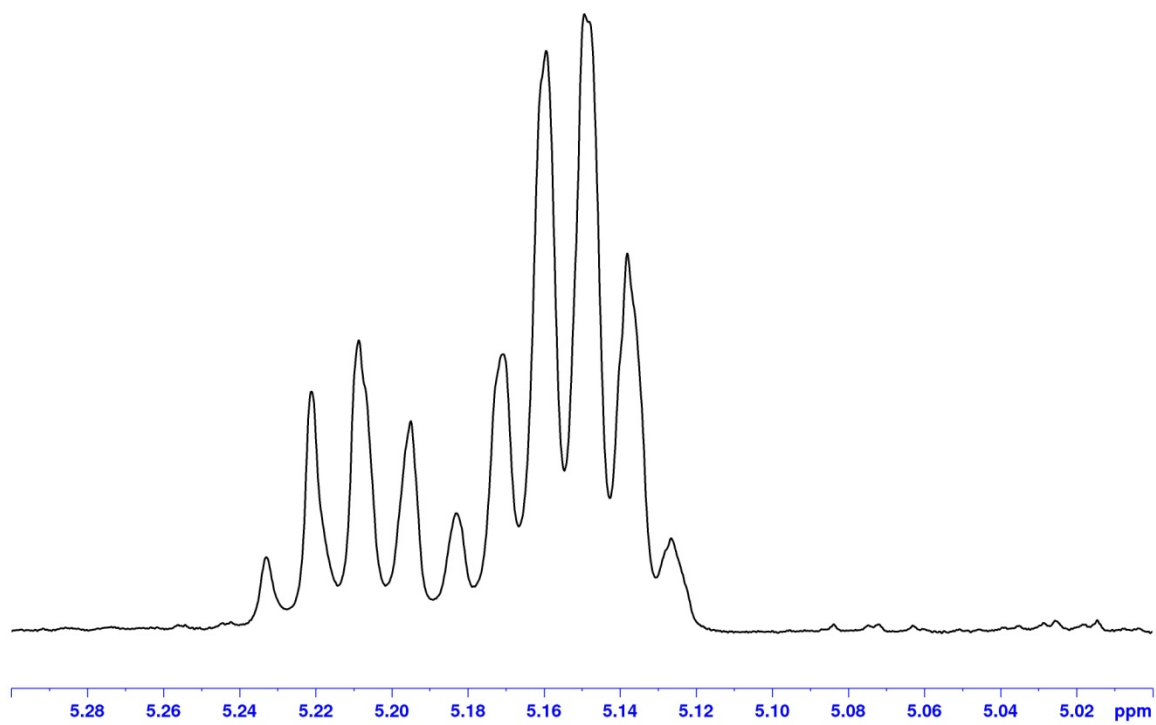

**Figure S1.** Methine regions ( $\delta=5.00\text{--}5.30\text{ppm}$ ) of the  $^1\text{H}$  and homodecoupled NMR spectra (600 MHz,  $\text{CDCl}_3$ , 298 K) of the PLA sample obtained by **3**.

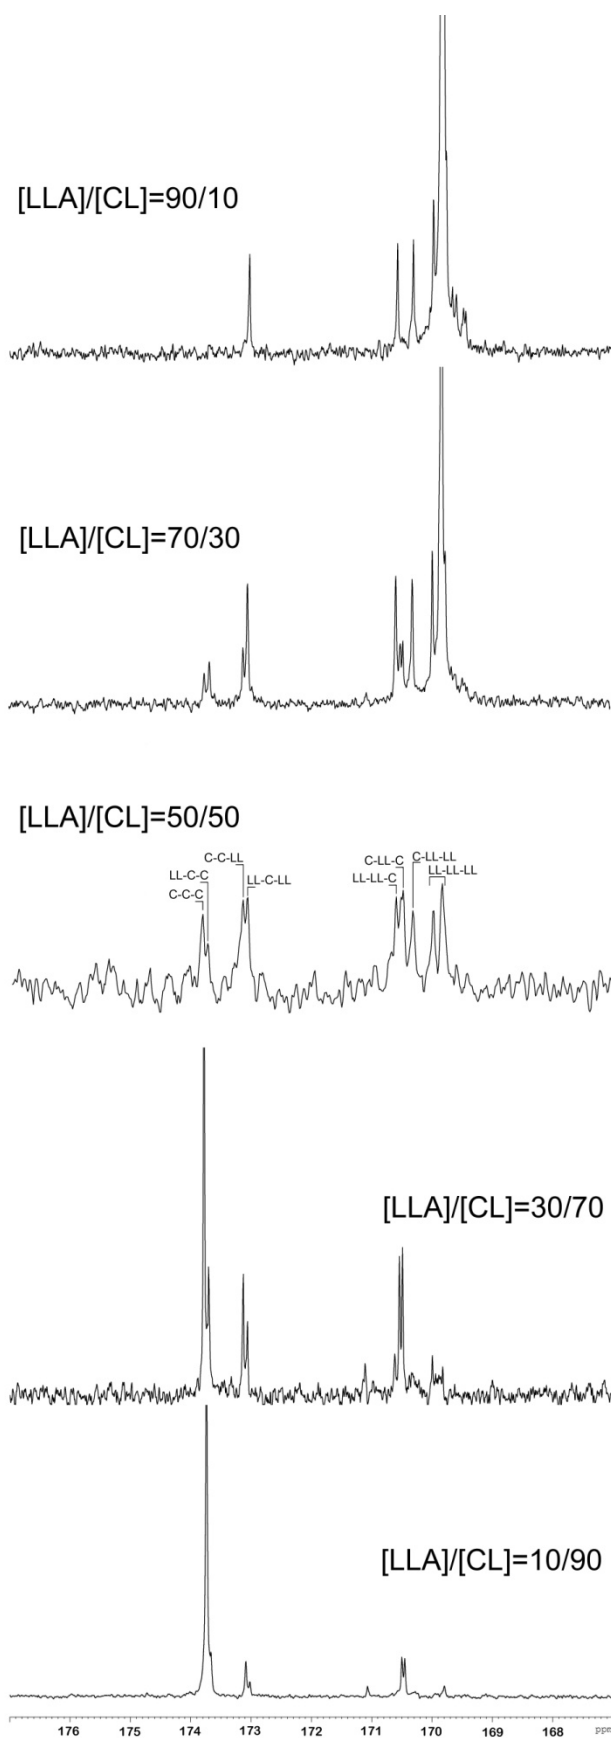

**Figure S2.**  $^{13}\text{C}$  NMR spectra ( $\text{CDCl}_3$ ,  $25^\circ\text{C}$ ) of PCL-co-PLLA copolymers by **3** and triad assignments. C represents the CL unit and L is the lactyl unit.

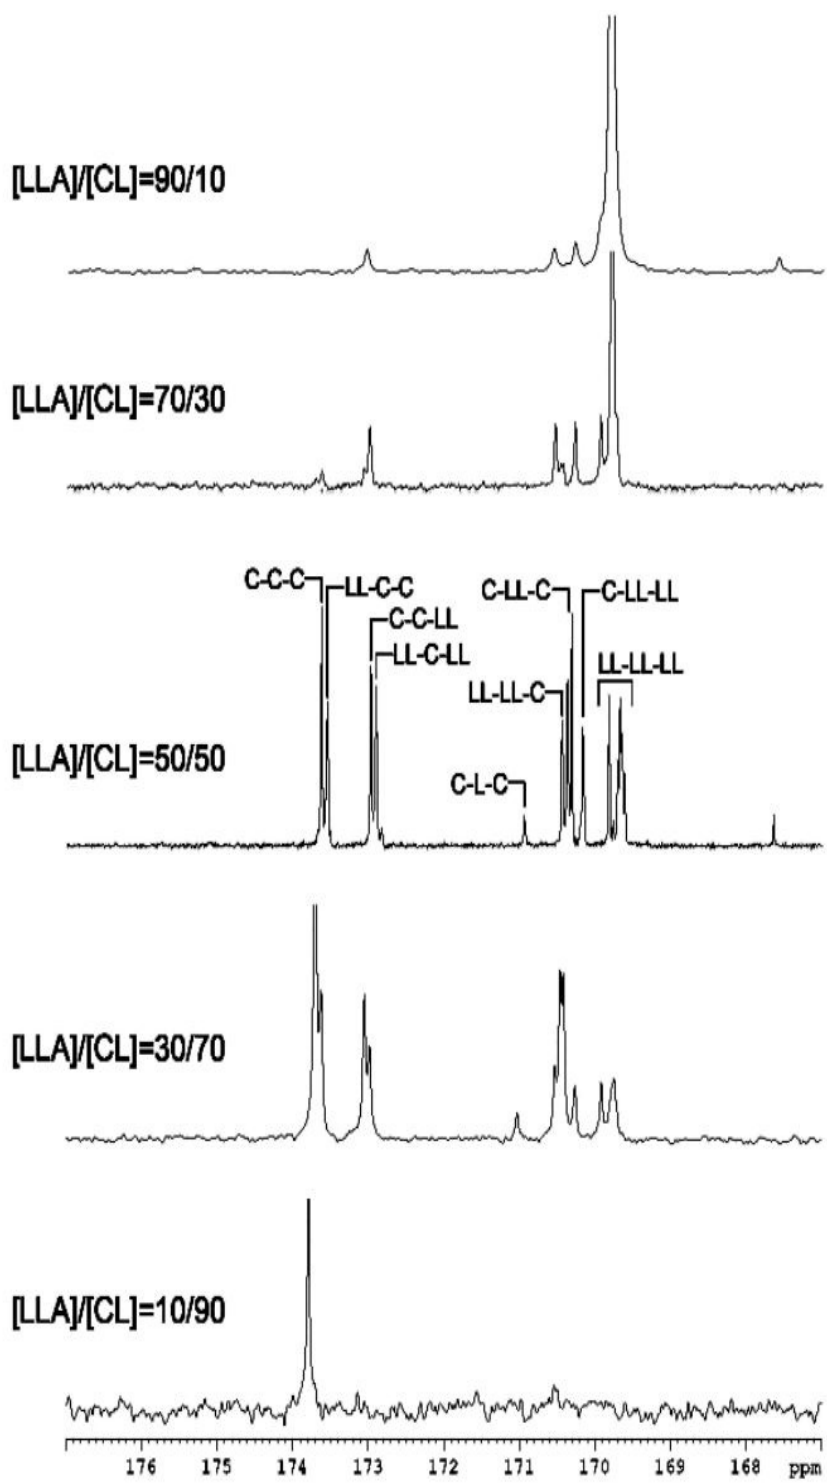

**Figure S3.**  $^{13}\text{C}$  NMR spectra ( $\text{CDCl}_3$ ,  $25^\circ\text{C}$ ) of PCL-co-PLLA copolymers by **1** and triad assignments. C represents the CL unit and L is the lactyl unit.

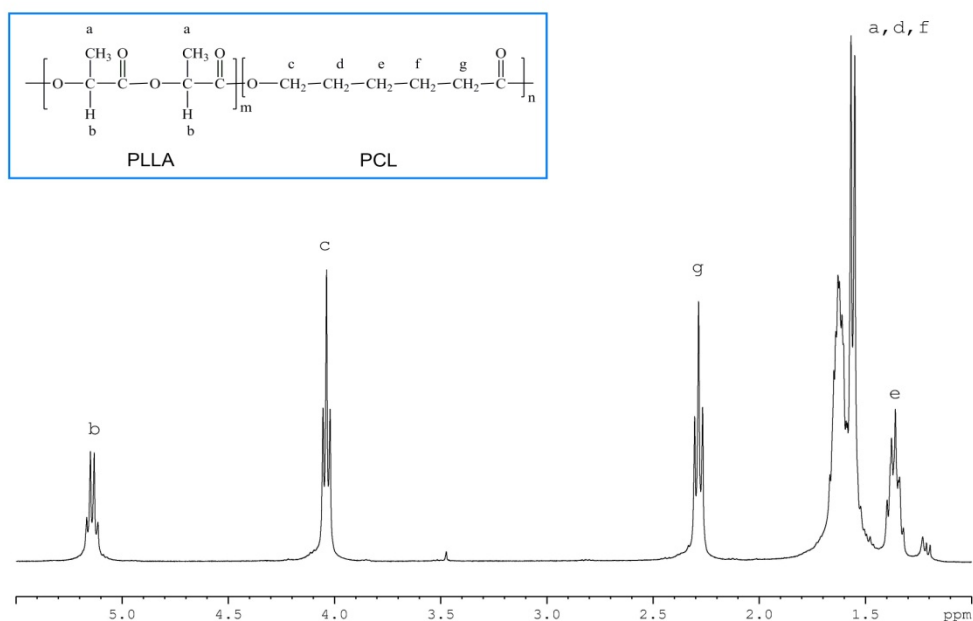

**Figure S4.**  $^1\text{H}$  NMR spectrum (600 MHz,  $\text{CDCl}_3$ , 298 K) of PCL-block-PLLA copolymer by **3**.

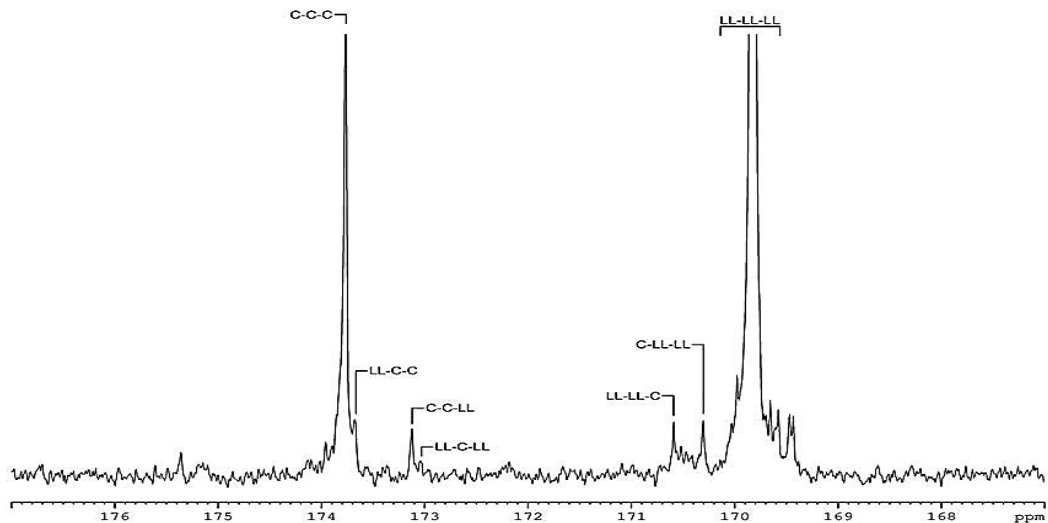

**Figure S5.**  $^{13}\text{C}$  NMR spectrum (150 MHz,  $\text{CDCl}_3$ , 298 K) of PCL-block-PLLA copolymer by **3**.

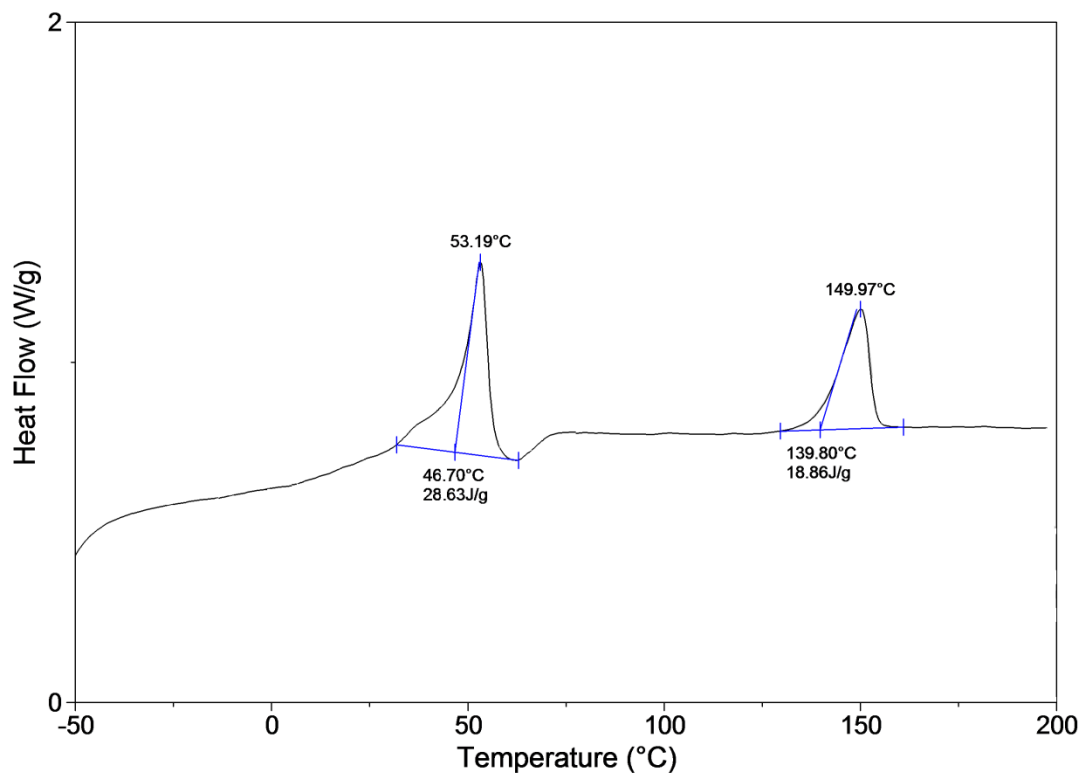

**Figure S6.** DSC thermogram (second heating cycle, 10°C/min) of the copolymer PCL-b-PLLA obtained with complex **3**.

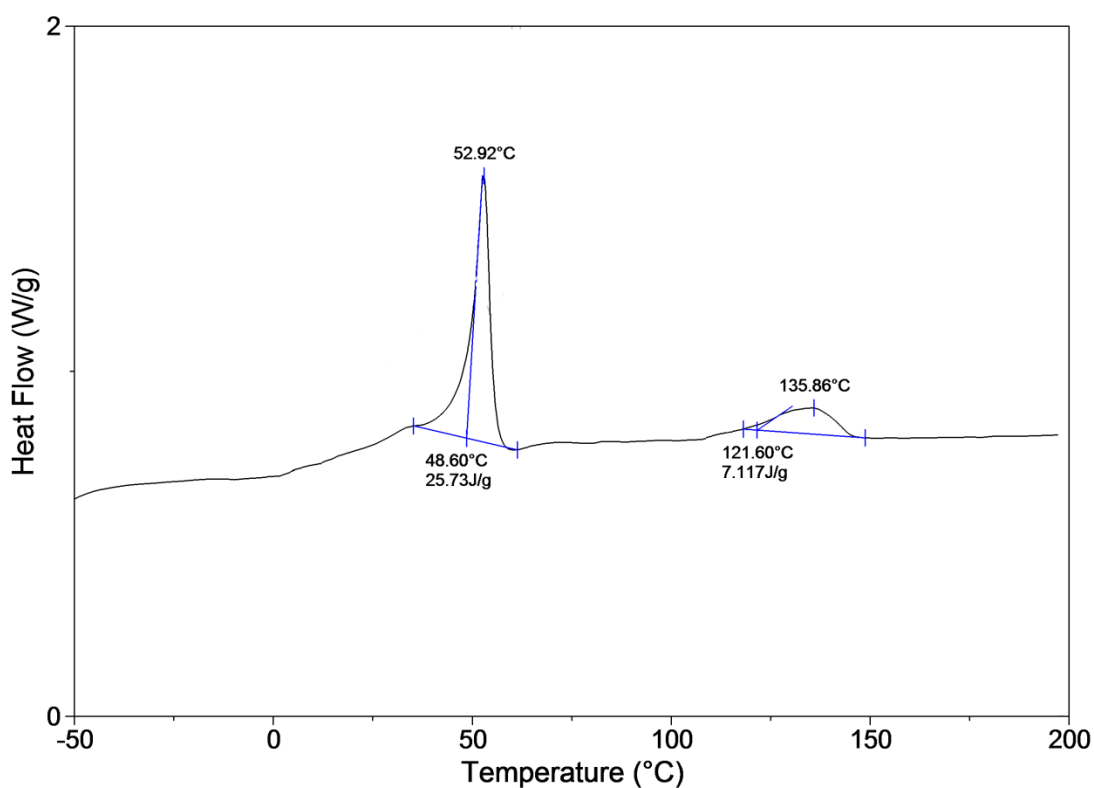

**Figure S7.** DSC thermogram (second heating cycle, 10°C/min) of the copolymer PCL-b-PLLA obtained with complex **1**.

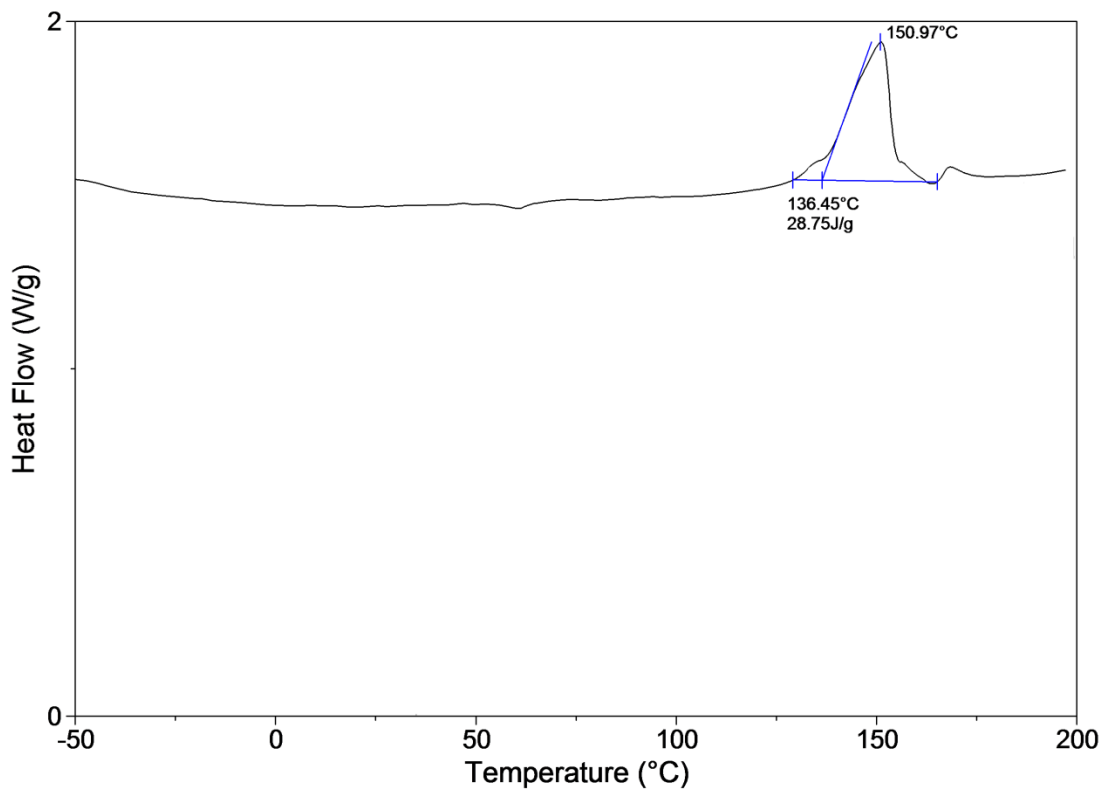

**Figure S8.** DSC thermogram (second heating cycle, 10°C/min) of the copolymer PLLA-b-PCL obtained with complex 3.

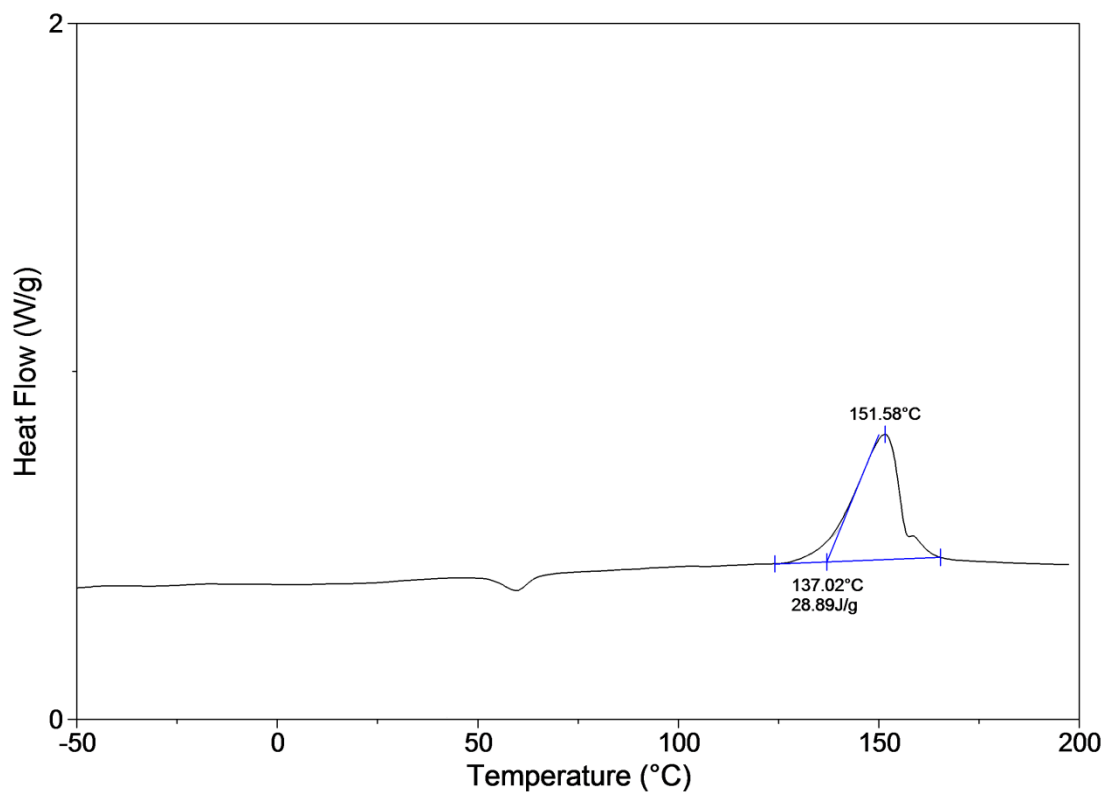

**Figure S9.** DSC thermogram (second heating cycle, 10°C/min) of the copolymer PLLA-b-PCL obtained with complex 1.



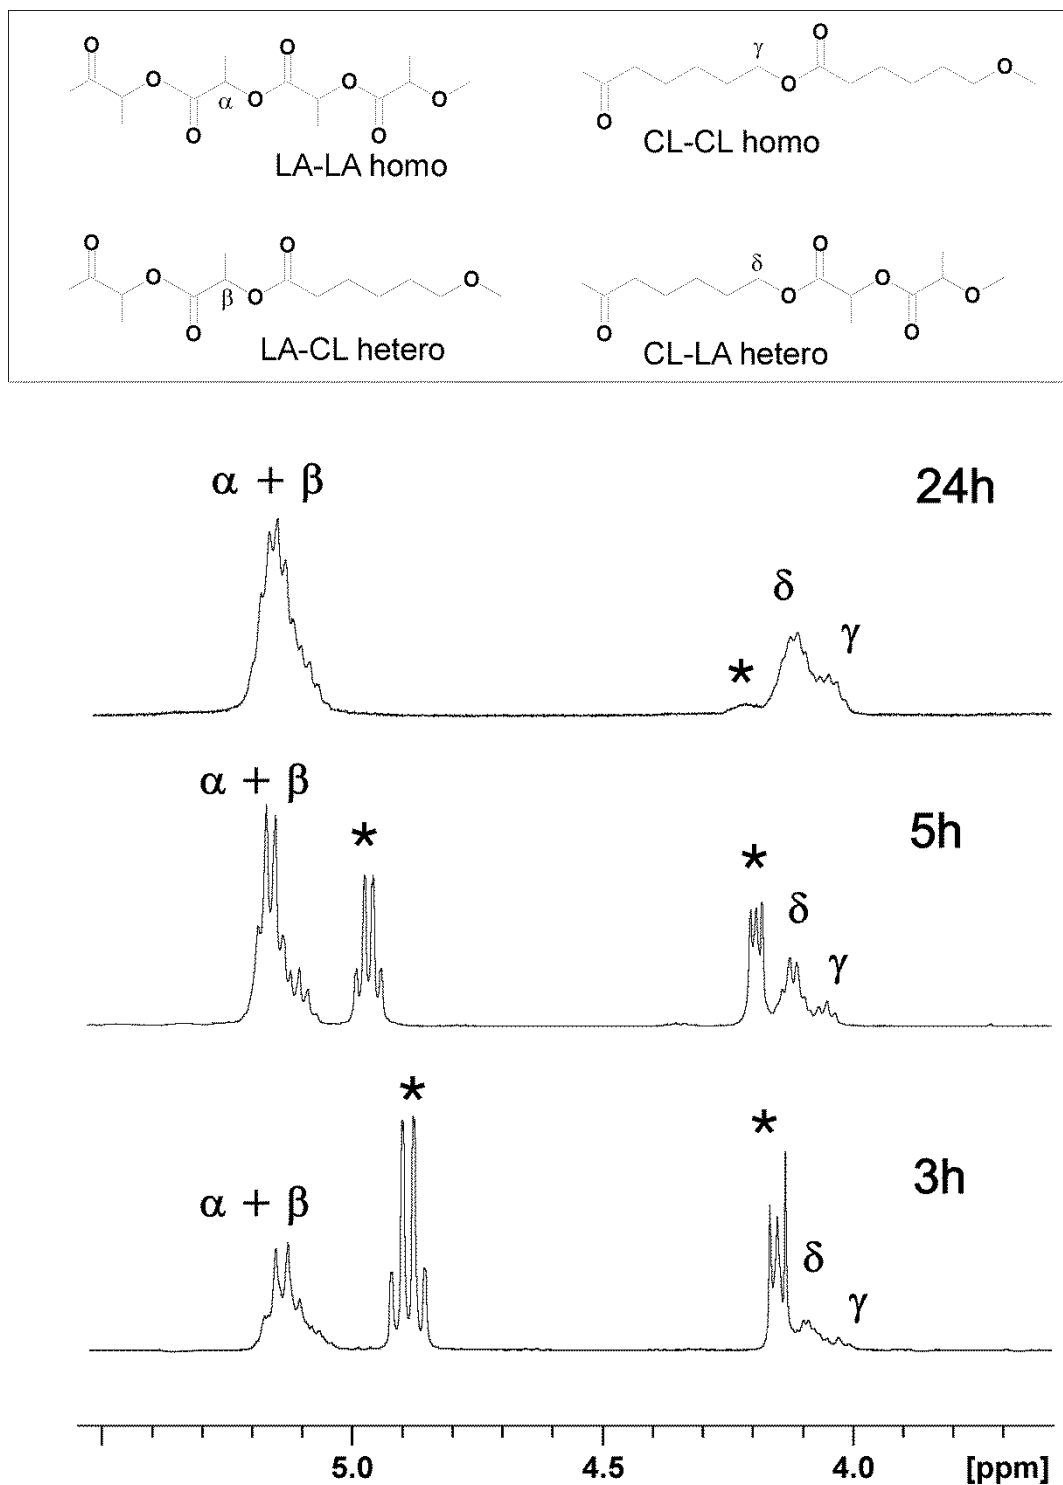

**Figure S10.**  $^1\text{H}$  NMR spectra (300 MHz,  $\text{CDCl}_3$ , 25  $^\circ\text{C}$ ) at 3, 5 and 24h of the reaction mixture of run 29 of Table 4. \* unreacted monomer.
